# Supplementary material
Source: publisher site journal article supplement (https://en-cdn.bio-protocol.org/attached/file/20190827/Supplementary%20file%20Appendix.docx)
Supplement: Supplementary file 1 [file Supplementary%20file%20Appendix.docx]

**Appendix**

**First PCR, heavy chain primer mix**

| **IGH** | | | |
| --- | --- | --- | --- |
| **First PCR** | **Forward 5′ to 3′ sequences** |  | **Reverse 5′ to 3′ sequences** |
| 5′ L-VH 1 | ACAGGTGCCCACTCCCAGGTGCAG | 3′ Cμ CH1 | GGAAGGAAGTCCTGTGCGAGGC |
| 5′ L-VH 2 | CTGCAACCGGTGTACATTGTGCCATCCGGATGACCCAGTC | 3′ Cγ CH1 | GGAAGGTGTGCACGCCGCTGGTC |
| 5′ L-VH 3 | AAGGTGTCCAGTGTGARGTGCAG | 3′ Cα CH1 | TGGGAAGTTTCTGGCGGTCACG |
| 5′ L-VH 4/6 | CCCAGATGGGTCCTGTCCCAGGTGCAG |  |  |
| 5′ L-VH 5 | CAAGGAGTCTGTTCCGAGGTGCAG |  |  |

**First PCR, lambda chain primer mix**

| **Igλ** | | | |
| --- | --- | --- | --- |
| **First PCR** | **Forward 5′ to 3′ sequences** |  | **Reverse 5′ to 3′ sequences** |
| 5′ L Vλ1 | GGTCCTGGGCCCAGTCTGTGCTG | 3′ Cλ | CACCAGTGTGGCCTTGTTGGCTTG |
| 5′ L Vλ2 | GGTCCTGGGCCCAGTCTGCCCTG |  |  |
| 5′ L Vλ3 | GCTCTGTGACCTCCTATGAGCTG |  |  |
| 5′ L Vλ4/5 | GGTCTCTCTCSCAGCYTGTGCTG |  |  |
| 5′ L Vλ6 | GTTCTTGGGCCAATTTTATGCTG |  |  |
| 5′ L Vλ7 | GGTCCAATTCYCAGGCTGTGGTG |  |  |
| 5′ L Vλ8 | GAGTGGATTCTCAGACTGTGGTG |  |  |

**First PCR, kappa chain primer mix**

| **Igκ** | | | |
| --- | --- | --- | --- |
| **First PCR** | **Forward 5′ to 3′ sequences** |  | **Reverse 5′ to 3′ sequences** |
| 5′ L Vκ1/2 | ATGAGGSTCCCYGCTCAGCTGCTGG | 3′ Cκ543 | GTTTCTCGTAGTCTGCTTTGCTCA |
| 5′ L Vκ3 | CTCTTCCTCCTGCTACTCTGGCTCCCAG |  |  |
| 5′ L Vκ4 | ATTTCTCTGTTGCTCTGGATCTCTG |  |  |

**Second PCR, heavy chain primer mix**

| **IGH** | | | |
| --- | --- | --- | --- |
| **Second PCR** | **Forward 5′ to 3′ sequences** |  | **Reverse 5′ to 3′ sequences** |
| 5′ AgeI VH1 | CTGCAACCGGTGTACATTCCCAGGTGCAGCTGGTGCAG | 3′ Cμ CH1-2 int§ | GGGAATTCTCACAGGAGACGA |
| 5′ AgeI VH1/5 | CTGCAACCGGTGTACATTCCGAGGTGCAGCTGGTGCAG | 3′ Cγ IgG int§ | GTTCGGGGAAGTAGTCCTTGAC |
| 5′ AgeI VH 1-18 | CTGCAACCGGTGTACATTCCCAGGTTCAGCTGGTGCAG | 3′ Cα CH1-2 int§ | GTCCGCTTTCGCTCCAGGTCACACT |
| 5′ AgeI VH 1-24 | CTGCAACCGGTGTACATTCCCAGGTCCAGCTGGTACAG |  |  |
| 5′ AgeI VH3 | CTGCAACCGGTGTACATTCTGAGGTGCAGCTGGTGGAG |  |  |
| 5′ AgeI VH3-23 | CTGCAACCGGTGTACATTCTGAGGTGCAGCTGTTGGAG |  |  |
| 5′ AgeI VH3-33 | CTGCAACCGGTGTACATTCTCAGGTGCAGCTGGTGGAG |  |  |
| 5′ AgeI VH 3-9 | CTGCAACCGGTGTACATTCTGAAGTGCAGCTGGTGGAG |  |  |
| 5′ AgeI VH4 | CTGCAACCGGTGTACATTCCCAGGTGCAGCTGCAGGAG |  |  |
| 5′ AgeI VH 4-34 | CTGCAACCGGTGTACATTCCCAGGTGCAGCTACAGCAGTG |  |  |
| 5′ AgeI VH4-39 | CTGCAACCGGTGTACATTCCCAGCTGCAGCTGCAGGAG |  |  |
| 5′ AgeI VH 6-1 | CTGCAACCGGTGTACATTCCCAGGTACAGCTGCAGCAG |  |  |

**Second PCR, lambda chain primer mix**

| **Igλ** | | | |
| --- | --- | --- | --- |
| **Second PCR** | **Forward 5′ to 3′ sequences** |  | **Reverse 5′ to 3′ sequences** |
| 5′ AgeI Vλ1 | CTGCTACCGGTTCCTGGGCCCAGTCTGTGCTGACKCAG | 3′ XhoI Cλ§ | CTCCTCACTCGAGGGYGGGAACAGAGTG |
| 5′ AgeI Vλ2 | CTGCTACCGGTTCCTGGGCCCAGTCTGCCCTGACTCAG |  |  |
| 5′ AgeI Vλ3 | CTGCTACCGGTTCTGTGACCTCCTATGAGCTGACWCAG |  |  |
| 5′ AgeI Vλ4/5 | CTGCTACCGGTTCTCTCTCSCAGCYTGTGCTGACTCA |  |  |
| 5′ AgeI Vλ6 | CTGCTACCGGTTCTTGGGCCAATTTTATGCTGACTCAG |  |  |
| 5′ AgeI Vλ7/8 | CTGCTACCGGTTCCAATTCYCAGRCTGTGGTGACYCAG |  |  |

**Second PCR, kappa chain primers**

| **Igκ** | | | |
| --- | --- | --- | --- |
| **Second PCR** | **Forward 5′ to 3′ sequences** |  | **Reverse 5′ to 3′ sequences** |
| 5′ Pan Vκ§ | ATGACCCAGWCTCCABYCWCCCTG | 3′ Cκ494 | GTGCTGTCCTTGCTGTCCTGCT |

§ primers used for sequencing from PCR products

**Specific PCR heavy chain primers**

| **Specific PCR for IgH** | **Forward 5′ to 3′ sequences** |  | **Reverse 5′ to 3′ sequences** |
| --- | --- | --- | --- |
| 5′ AgeI VH1 | CTGCAACCGGTGTACATTCCCAGGTGCAGCTGGTGCAG | SalI 1/2/4/5 | TGCGAAGTCGACGCTGAGGAGACGGTGACCAG |
| 5′ AgeI VH1/5 | CTGCAACCGGTGTACATTCCGAGGTGCAGCTGGTGCAG | SalI 3 | TGCGAAGTCGACGCTGAAGAGACGGTGACCATTG |
| 5′ AgeI VH 1-18 | CTGCAACCGGTGTACATTCCCAGGTTCAGCTGGTGCAG | SalI 6 | TGCGAAGTCGACGCTGAGGAGACGGTGACCGTG |
| 5′ AgeI VH 1-24 | CTGCAACCGGTGTACATTCCCAGGTCCAGCTGGTACAG |  |  |
| 5′ AgeI VH3 | CTGCAACCGGTGTACATTCTGAGGTGCAGCTGGTGGAG |  |  |
| 5′ AgeI VH3-23 | CTGCAACCGGTGTACATTCTGAGGTGCAGCTGTTGGAG |  |  |
| 5′ AgeI VH3-33 | CTGCAACCGGTGTACATTCTCAGGTGCAGCTGGTGGAG |  |  |
| 5′ AgeI VH 3-9 | CTGCAACCGGTGTACATTCTGAAGTGCAGCTGGTGGAG |  |  |
| 5′ AgeI VH4 | CTGCAACCGGTGTACATTCCCAGGTGCAGCTGCAGGAG |  |  |
| 5′ AgeI VH 4-34 | CTGCAACCGGTGTACATTCCCAGGTGCAGCTACAGCAGTG |  |  |
| 5′ AgeI VH4-39 | CTGCAACCGGTGTACATTCCCAGCTGCAGCTGCAGGAG |  |  |
| 5′ AgeI VH 6-1 | CTGCAACCGGTGTACATTCCCAGGTACAGCTGCAGCAG |  |  |

**Specific PCR kappa chain primers**

| **Specific PCR for Igk** | **Forward 5′ to 3′ sequences** |  | **Reverse 5′ to 3′ sequences** |
| --- | --- | --- | --- |
| 5′ AgeI Vκ1-5 | CTGCAACCGGTGTACATTCTGACATCCAGATGACCCAGTC | BsiWI Jκ1/4 | GCCACCGTACGTTTGATYTCCACCTTGGTC |
| 5′ AgeI Vκ1-9 | TTGTGCTGCAACCGGTGTACATTCAGACATCCAGTTGACCCAGTCT | BsiWI Jκ2 | GCCACCGTACGTTTGATCTCCAGCTTGGTC |
| 5′ AgeI Vκ1D-43 | CTGCAACCGGTGTACATTGTGCCATCCGGATGACCCAGTC | BsiWI Jκ3 | GCCACCGTACGTTTGATATCCACTTTGGTC |
| 5′ AgeI Vκ2-24 | CTGCAACCGGTGTACATGGGGATATTGTGATGACCCAGAC | BsiWI Jκ5 | GCCACCGTACGTTTAATCTCCAGTCGTGTC |
| 5′ AgeI Vκ2-28 | CTGCAACCGGTGTACATGGGGATATTGTGATGACTCAGTC |  |  |
| 5′ AgeI Vκ2-30 | CTGCAACCGGTGTACATGGGGATGTTGTGATGACTCAGTC |  |  |
| 5′ Age Vκ3-11 | TTGTGCTGCAACCGGTGTACATTCAGAAATTGTGTTGACACAGTC |  |  |
| 5′ Age Vκ3-15 | CTGCAACCGGTGTACATTCAGAAATAGTGATGACGCAGTC |  |  |
| 5′ Age Vκ3-20 | TTGTGCTGCAACCGGTGTACATTCAGAAATTGTGTTGACGCAGTCT |  |  |
| 5′ Age Vκ4-1 | CTGCAACCGGTGTACATTCGGACATCGTGATGACCCAGTC |  |  |

**Specific PCR lambda chain primers**

| **Specific PCR for Igλ** | **Forward 5′ to 3′ sequences** |  | **Reverse 5′ to 3′ sequences** |
| --- | --- | --- | --- |
| 5′ AgeI Vλ1 | CTGCTACCGGTTCCTGGGCCCAGTCTGTGCTGACKCAG | 3′ XhoI Cλ | CTCCTCACTCGAGGGYGGGAACAGAGTG |
| 5′ AgeI Vλ2 | CTGCTACCGGTTCCTGGGCCCAGTCTGCCCTGACTCAG |  |  |
| 5′ AgeI Vλ3 | CTGCTACCGGTTCTGTGACCTCCTATGAGCTGACWCAG |  |  |
| 5′ AgeI Vλ4/5 | CTGCTACCGGTTCTCTCTCSCAGCYTGTGCTGACTCA |  |  |
| 5′ AgeI Vλ6 | CTGCTACCGGTTCTTGGGCCAATTTTATGCTGACTCAG |  |  |
| 5′ AgeI Vλ7/8 | CTGCTACCGGTTCCAATTCYCAGRCTGTGGTGACYCAG |  |  |

**Primer for sequencing from Ig-plasmids**

| **IgH, Igκ, Igλ** | |
| --- | --- |
|  | **Forward 5′ to 3′ sequences** |
| Absense | gcttcgttagaacgcggctac |
